# Supplementary material for: Radiation Treatment Timing and Dose Delivery: Effects on Bladder Cancer Cells in 3D in Vitro Culture
Source: MDPI journal article supplement (doi:10.3390/radiation2040025), 2022-10-18
Supplement: s1 [file s1]

Archive with 1 entries (1 files):
- radiation-1924450-supplementary.pdf
